# Supplementary material for: High-efficiency and high-fidelity ssDNA circularisation via the pairing of five 3′-terminal bases to assist LR-LAMP for the genotyping of single-nucleotide polymorphisms
Source: Royal Society of Chemistry journal article supplement (doi:10.1039/d2an01042a), 2022-01-01
Supplement: d2an01042a1.pdf [file d2an01042a1.pdf]

## Supplementary information

**High-efficiency and high-fidelity ssDNA circularisation via the pairing of five 3'-terminal bases to assist LR-LAMP for the genotyping of single-nucleotide polymorphisms**

**Taiwen Li<sup>a</sup>, Huayan Zou<sup>a</sup>, Jing Zhang<sup>a</sup>, Haixia Ding<sup>a</sup>, Cheng Li<sup>a</sup>, Xiangru Chen<sup>a</sup>, Yunzhou Li<sup>a</sup>, Wenzhuo Feng<sup>\*a</sup> and Koji Kageyama<sup>b</sup>**

<sup>a</sup>Key Laboratory of Agricultural Microbiology, College of Agriculture, Guiyang 550025, China. Email: wenzhuofeng@126.com.

<sup>b</sup>River Basin Research Center, Gifu University, 1-1 Yanagido, Gifu 501-1193, Japan.

**Table S1.** The nucleic acids sequences used in this study.

| Name                | Sequence                                                                                         |
|---------------------|--------------------------------------------------------------------------------------------------|
| sDNA1               | 5'-CGCTCTGAACAAAG-3'                                                                             |
| sDNA2               | 5'-CGCTCTGAACAAAGT-3'                                                                            |
| sDNA3 / sDNA3-A     | 5'-CGCTCTGAACAAGTC-3'                                                                            |
| sDNA3-T             | 5'-CGCTCTGAACATAGTC-3'                                                                           |
| sDNA3-C             | 5'-CGCTCTGAACACAGTC-3'                                                                           |
| sDNA3-G             | 5'-CGCTCTGAACAGAGTC-3'                                                                           |
| sDNA4               | 5'-CGCTCTGAACAAAGTCA-3'                                                                          |
| sDNA5               | 5'-CGCTCTGAACAAAGTCAT-3'                                                                         |
| sDNA6               | 5'-CGCTCTGAACAAAGTCATA-3'                                                                        |
| sDNA7               | 5'-CGCTCTGAACAAAGTCATAA-3'                                                                       |
| sDNA8               | 5'-CGCTCTGAACAAAGTCATAAT-3'                                                                      |
| sDNA9               | 5'-CGCTCTGAACAAAGTCATAATC-3'                                                                     |
| sDNA10 / sDNA10-A   | 5'-CGCTCTGAACAAGTCATAATCT-3'                                                                     |
| sDNA10-T            | 5'-CGCTCTGAACATAGTCATAATCT-3'                                                                    |
| sDNA10-C            | 5'-CGCTCTGAACACAGTCATAATCT-3'                                                                    |
| sDNA10-G            | 5'-CGCTCTGAACAGAGTCATAATCT-3'                                                                    |
| I-DNA62-A           | 5P-TGTTTCAGAGCGACCCAAACCCACCCAACCTCCTCCTCCTCCGTCGAAGATTATGACTA-3'                                |
| I-DNA62 / I-DNA62-T | 5P-TGTTTCAGAGCGACCCAAACCCACCCAACCTCCTCCTCCTCCTCCGTCGAAGATTATGACTT-3'                             |
| I-DNA62-C           | 5P-TGTTTCAGAGCGACCCAAACCCACCCAACCTCCTCCTCCTCCTCCGTCGAAGATTATGACTC-3'                             |
| I-DNA62-G           | 5P-TGTTTCAGAGCGACCCAAACCCACCCAACCTCCTCCTCCTCCTCCGTCGAAGATTATGACTG-3'                             |
| 5'-sDNA-A           | 5'-GAACAAGTCATAATCTT-3'                                                                          |
| 5'-sDNA-T           | 5'-GAACTAAGTCATAATCTT-3'                                                                         |
| 5'-sDNA-C           | 5'-GAACCAAGTCATAATCTT-3'                                                                         |
| 5'-sDNA-G           | 5'-GAACGAAGTCATAATCTT-3'                                                                         |
| I-DNA38             | 5P-GTTGTGCCAACTCCCTTGTGAATCGTGCGGAAACGCTC-3'                                                     |
| sDNA38-A            | 5'-TTGGCACAACAAGCG-3'                                                                            |
| sDNA38-T            | 5'-TTGGCACAACAGCG-3'                                                                             |
| sDNA38-C            | 5'-TTGGCACAACCAGCG-3'                                                                            |
| sDNA38-G            | 5'-TTGGCACAACGAGCG-3'                                                                            |
| MT-DNA              | 5'-TCGAAGATTATGACTTATAGTGAAAGTATT-3                                                              |
| WT-DNA              | 5'-TCGAAGATTATGACTTTAGTGAAAGTATT-3                                                               |
| I <sub>M</sub> -DNA | 5P-AAGTCATAATCTTCCCTATCCTACCCAACCAACCGAAACTCACCTCACCTCACAGGAAACTAT-3'                            |
| I <sub>W</sub> -DNA | 5P-AAGTCATAATCTTCCCTATCCTACCCAACCAACCGAAACTCACCTCACCTCACAGGAAACTAA-3'                            |
| LAMP primers        | FIP 5'-AAGTCATAATCTTCTTTTTGGTGGTTGGGTAGGATAGG-3'<br>BIP 5'-TAGTTTCCTGTGTTTTCCGAAACTCACCTCACCT-3' |
| PCR primers         | SNP-F 5'-CTGGCGCAAATCTTCTGA-3'<br>SNP-R 5'-CGTCCACAGAGCGAGTTTTTC-3'                              |

**Table S2.** The comparison of the LR-LAMP method with other LAMP-based assays for SNPs detection

| Methods           | Sensitivity | Accuracy | Result analysis                           | Reference |
|-------------------|-------------|----------|-------------------------------------------|-----------|
| PE-LAMP           | 1.66 fM     | 0.1%     | Fluorescence                              | S1        |
| AS-LAMP           | 166 aM      | —        | Agarose gel electrophoresis               | S2        |
| LAMP-Invader-AuNP | 1.66 fM     | —        | Naked eye                                 | S3        |
| mLAMP             | 100 aM      | 0.1%     | Fluorescence                              | S4        |
| PA-LAMP           | 22 aM       | 0.01%    | Fluorescence                              | S5        |
| ARMS-SNP LAMP     | 10 pg       | —        | Naked eye                                 | S6        |
| LAMP-MC           | —           | —        | Melting curve analysis                    | S7        |
| SNP-LAMP          | 10 pg       | 0.5%     | Agarose gel electrophoresis/<br>LFD strip | S8        |
| LR-LAMP           | 100 aM      | 0.01%    | Fluorescence /<br>Naked eye               | This work |

**References:**

- S1: S. Ding, R. Chen, G. Chen, M. Li, J. Wang, J. Zou, F. Du, J. Dong, X. Cui, X. Huang, Y. Deng and Z. Tang, *Theranostics*, 2019, **9**, 3723-3731.
- S2: F. F. Carlos, B. Veigas, A. S. Matias, G. Doria, O. Flores and P. V. Baptista, *Biotechnol. Rep.*, 2017, **16**, 21-25.
- S3: Y. Lu, X. Ma, J. Wang, N. Sheng, T. Dong, Q. Song, J. Rui, B. Zou and G. Zhou, *Biosens. Bioelectron.*, 2017, **90**, 388-393.
- S4: Y. Ren, Y. Li, X. Duan, H. Wang and Z. Li, *ChemistrySelect*, 2019, **4**, 1423-1427.
- S5: W. Du, J. Ge, J. Li, L. Tang, R. Yu and J. Jiang, *Anal. Chim. Acta.*, 2019, **1050**, 132-138.
- S6: S. Tamura, T. Maeda, K. Misawa, M. Osa, T. Hamamoto, A. Yuki, K. Imai, K. Mikita, K. Morichika, A. Kawana, H. Matsumoto and S. Nonoyama, *J. Microbiol. Methods*, 2017, **141**, 108-114.
- S7: C. Drogou, F. Sauvet, M. Erblang, L. Detemmerman, C. Derbois, M. C. Erkel, A. Boland, J. F. Deleuze, D. Gomez-Merino and M. Chennaoui, *Biotechnol. Rep.*, 2020, **26**, e00468.
- S8: S. Yongkiettrakul, J. Kampeera, W. Chareanchim, R. Rattanajak, W. Pornthanakasem, W. Kiatpathomchai and D. Kongkasuriyachai, *Parasitol. Int.*, 2017, **66**, 964-971.

**Table S3.** The isolates of *Phytophthora infestans* used in this study.

| Isolate | Origin (xxx) | <i>RPA190</i> 1145<br>SNP genotype |
|---------|--------------|------------------------------------|
| AH16-10 | Anhui        | T                                  |
| AH16-17 | Anhui        | T                                  |
| AH16-18 | Anhui        | T                                  |
| CQ2016  | Chongqing    | T/A                                |
| HN16-1  | Henan        | T/A                                |
| HB1501  | Hebei        | T                                  |
| HIY1602 | -            | A                                  |
| NL07434 | -            | T                                  |
| YN02809 | Yuannan      | T/A                                |
| YN21206 | Yuannan      | T/A                                |

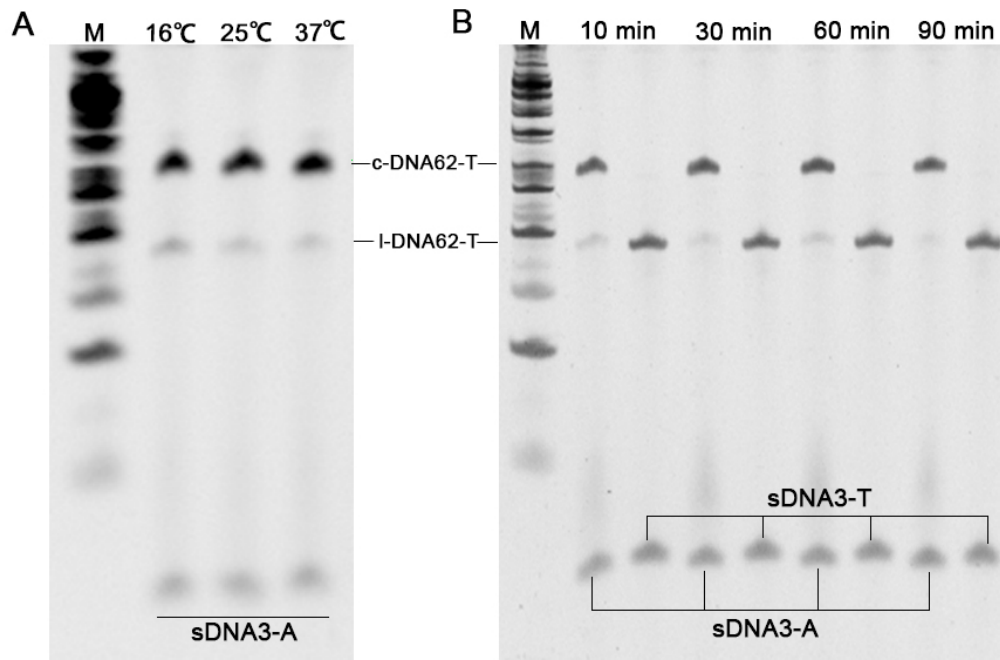

**Figure S1.** Effects of (A) ligation temperature and (B) ligation time on the efficiency of circularization of I-DNA62-T. Experiments were carried out in 1×T4 DNA ligase with T4 DNA ligase (70 U), and the products were separated on 15% denaturing polyacrylamide gels. I-DNA<sub>62</sub>:splint ratio = 1:2 (0.25:0.5 μM).



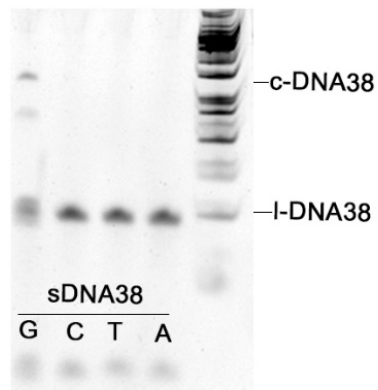

**Figure S3.** The fidelity of the cyclization with 38-base I-DNA. The experiments were carried out in 1×T4 DNA ligase with T4 DNA ligase (70 U) at 37°C for 10 min, and the products were separated on 15% denaturing polyacrylamide gels. I-DNA:sDNA ratio = 1:2 (0.25:0.5 μM).

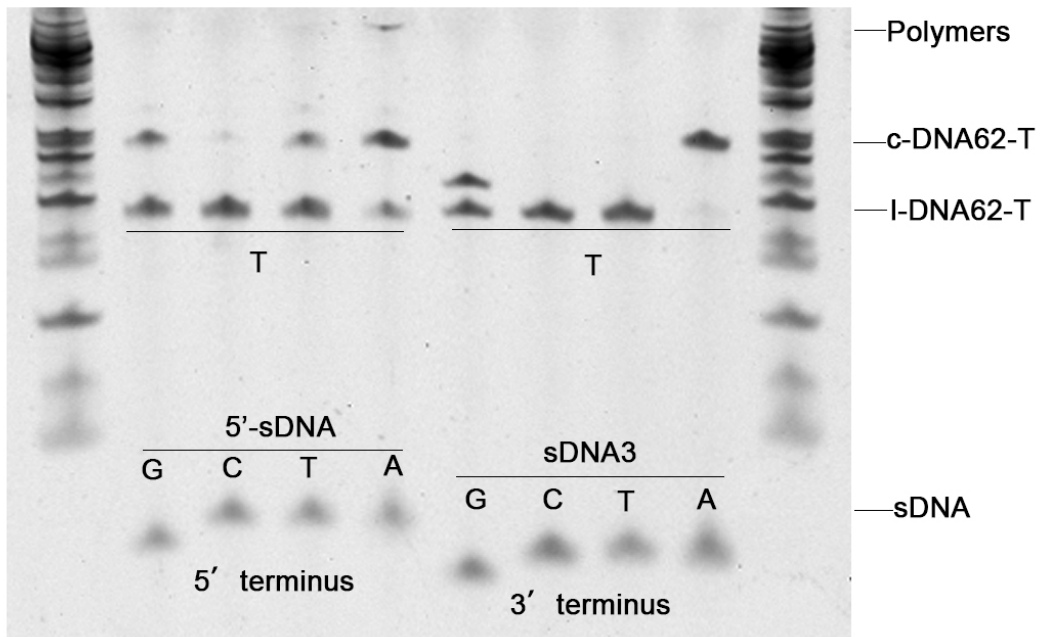

**Figure S4.** Comparison of the fidelity of the two cyclization structures. “5’ terminus” i.e., the 3’ terminus of I-DNA62 had a long-paired base, whereas the 5’ terminus exhibited pairing using only five bases; “3’ terminus” i.e., the 5’ terminus of I-DNA62 had a long-paired base, whereas the 3’ terminus exhibited pairing using only five bases. The experiments were carried out in 1×T4 DNA ligase with T4 DNA ligase (70 U) at 37°C for 10 min, and the products were separated on 15% denaturing polyacrylamide gels. I-DNA:sDNA ratio = 1:2 (0.25:0.5 μM).



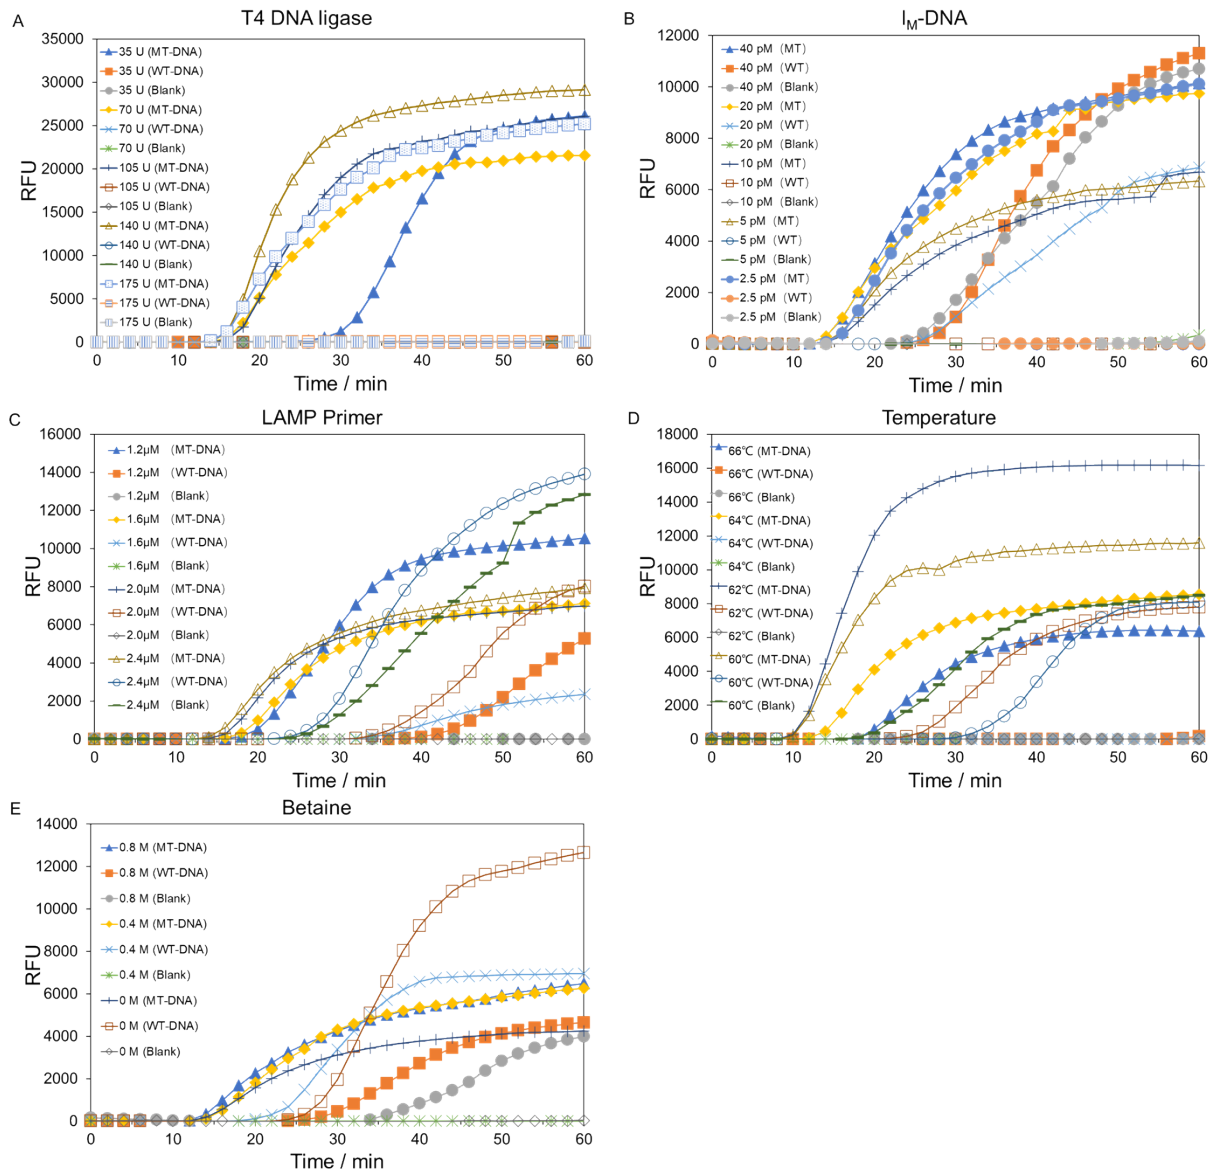

**Figure S5.** Optimization of LR-LAMP reaction conditions for SNP detection. The effects of the concentrations of  $I_M$ -DNA (2.5, 5, 10 and 20 pM) and T4 DNA ligase (70, 105, 140 and 175 U) on the ligation, as well as those of the concentrations of LAMP primers (1.2, 1.6, 2, 2.4  $\mu$ M each) and betaine (0, 0.4, and 0.8 M) and reaction temperature (60°C, 62°C, 64°C and 66°C) on LAMP amplification. The MT-DNA and WT-DNA target concentrations were 1 pM.

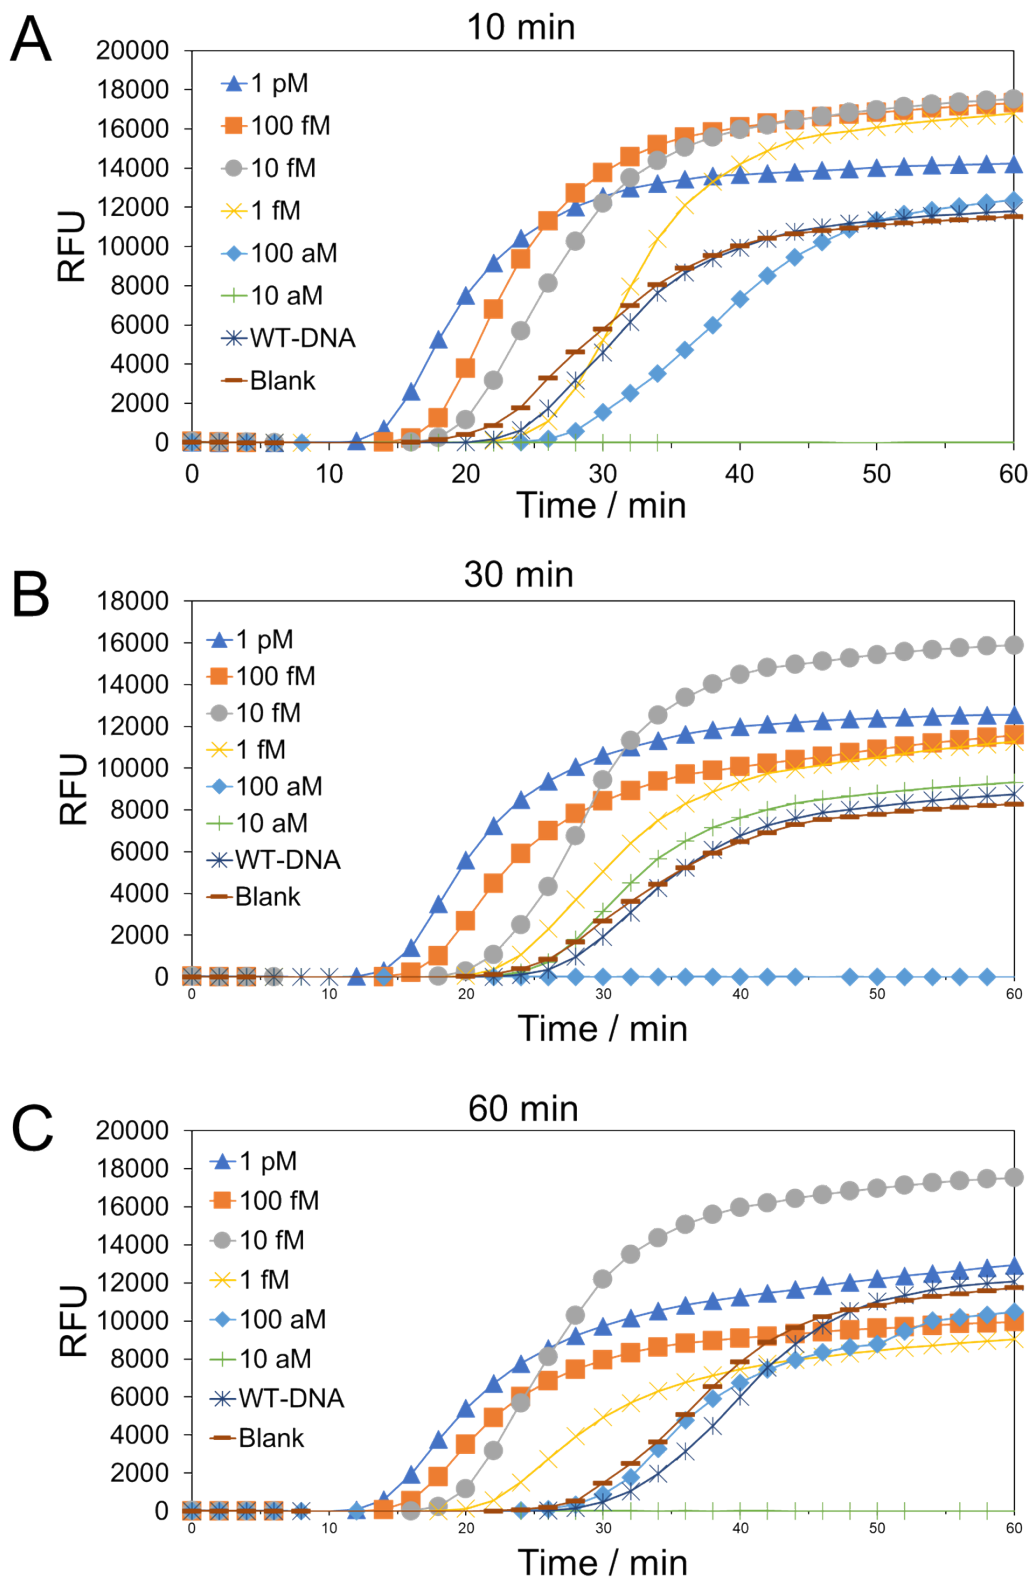

**Figure S6.** The ligation time was optimized to improve sensitivity. (A) 10 min, (B)30 min, and (C) 60 min. The concentration of MT-DNA was serially diluted from 1pM to 10 aM. WT-DNA target concentrations were 1 pM.

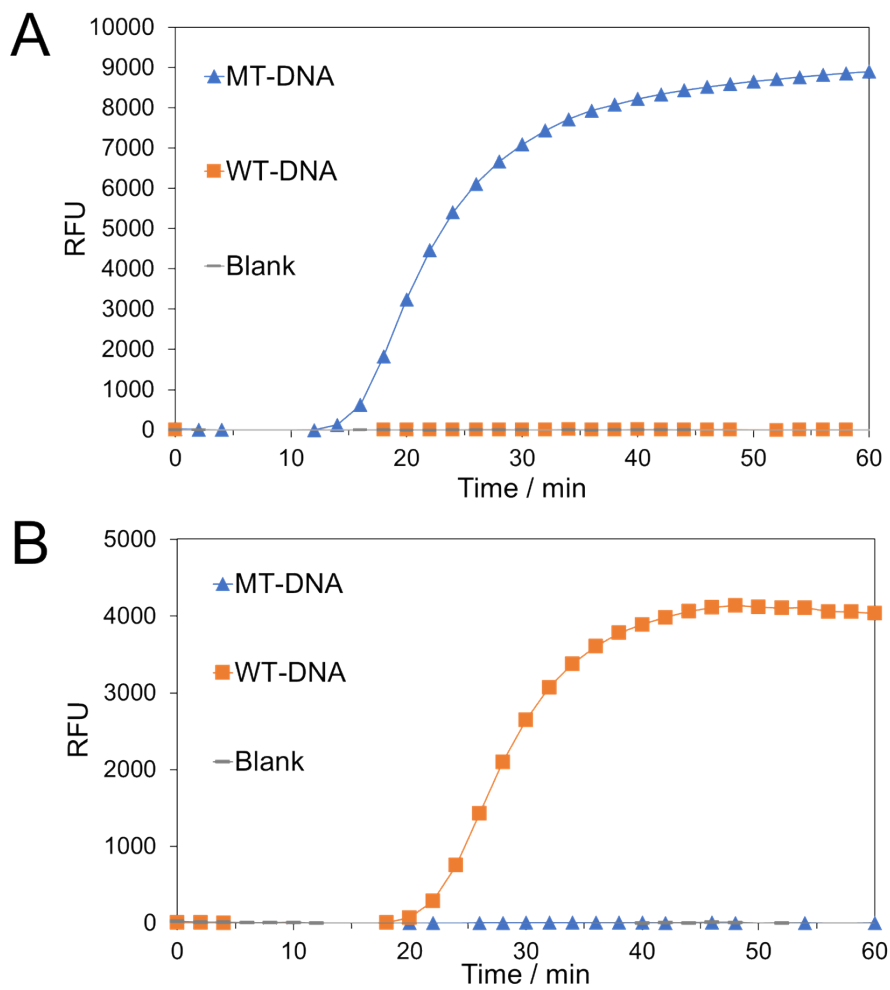

**Figure S7.** Real-time fluorescence curves obtained from LR-LAMP using the optimum conditions. The MT-DNA and WT-DNA target concentrations were 1 pM. (A) I<sub>M</sub>-DNA was used. (B) I<sub>W</sub>-DNA was used.
